# Supplementary material for: C–H⋯Br–C vs. C–Br⋯Br–C vs. C–Br⋯N bonding in molecular self-assembly of pyridine-containing dyes
Source: Royal Society of Chemistry journal article supplement (doi:10.1039/c6ra10094e), 2016-01-01
Supplement: c6ra10094e1.pdf [file c6ra10094e1.pdf]

## Electronic Supplementary Information

### C–H···Br–C vs. C–Br···Br–C vs. C–Br···N bonding in molecular self-assembly of the pyridine-containing dyes

Damir A. Safin, Maria G. Babashkina, Koen Robeyns and Yann Garcia\*

*Institute of Condensed Matter and Nanosciences, Molecules, Solids and Reactivity (IMCN/MOST), Université catholique de Louvain, Place L. Pasteur 1, 1348 Louvain-la-Neuve, Belgium. E-mail: yann.garcia@uclouvain.be; Fax: +32 1047 2330; Tel: +32 1047 2831*

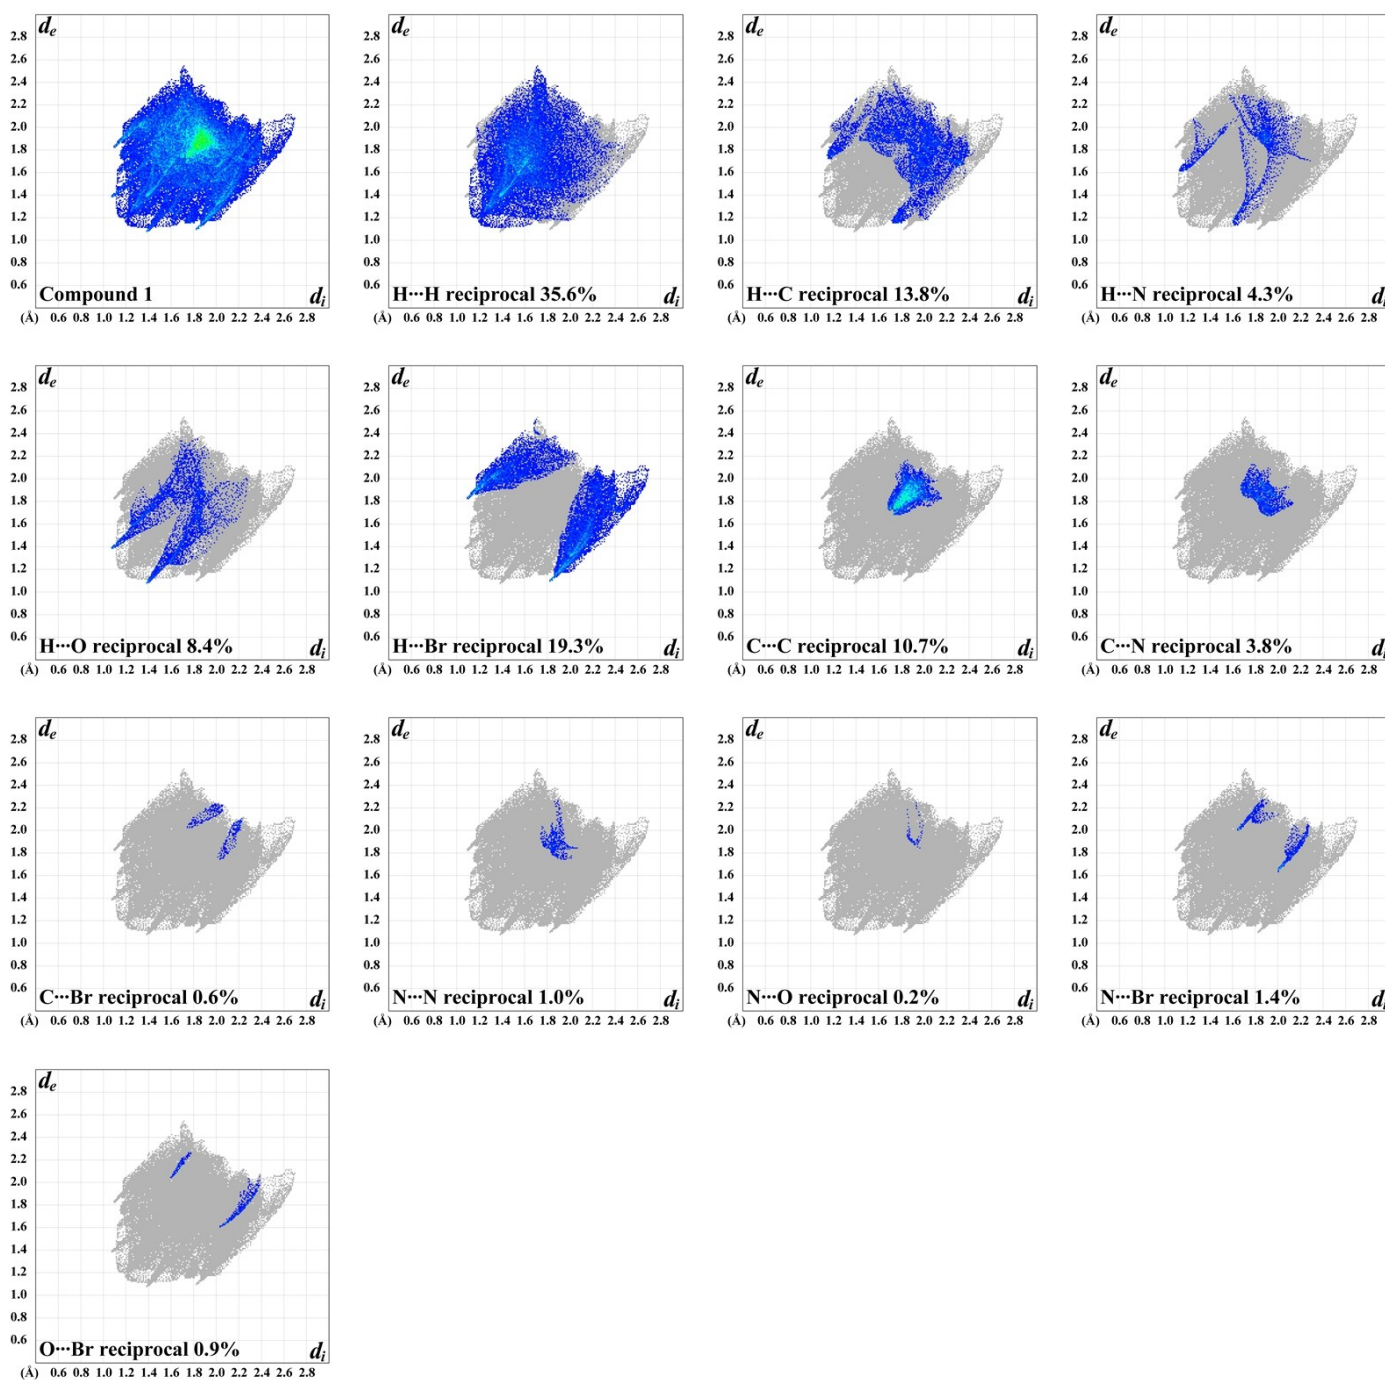

**Fig. S1** 2D fingerprint plots and decomposed 2D fingerprint plots of observed contacts for **1**.

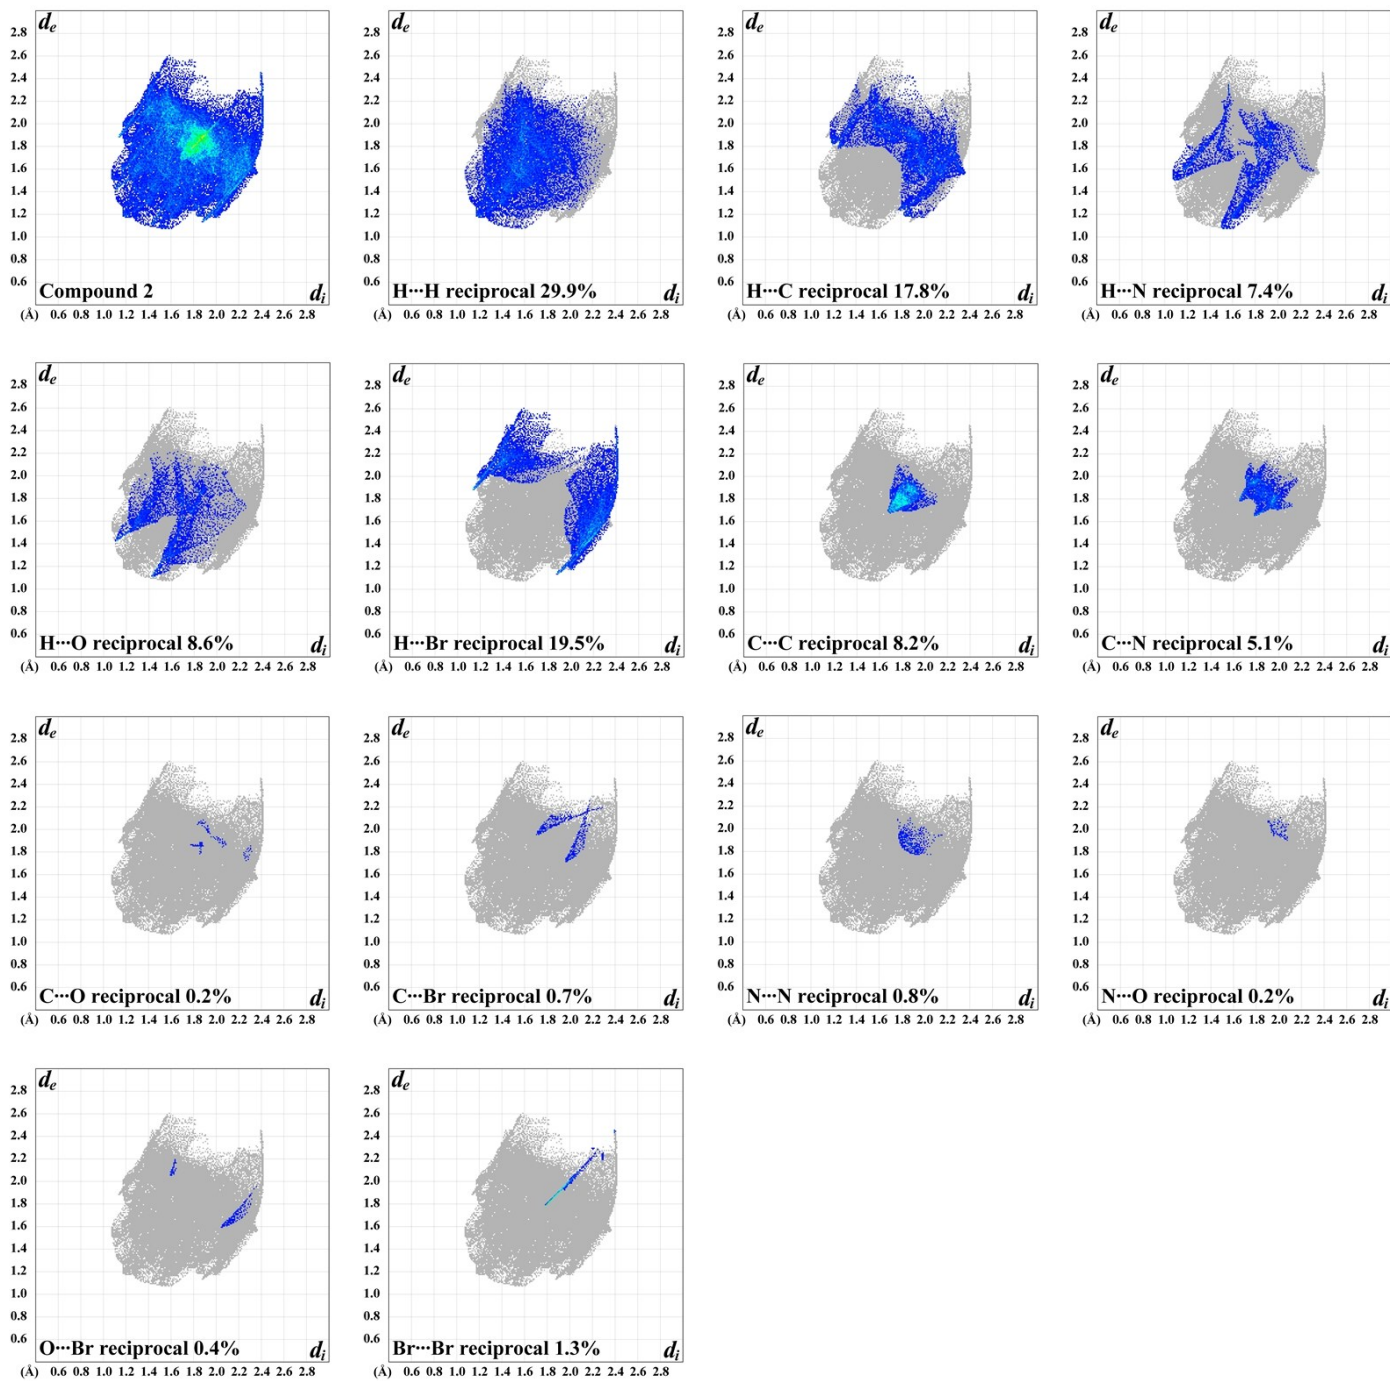

**Fig. S2** 2D fingerprint plots and decomposed 2D fingerprint plots of observed contacts for **2**.

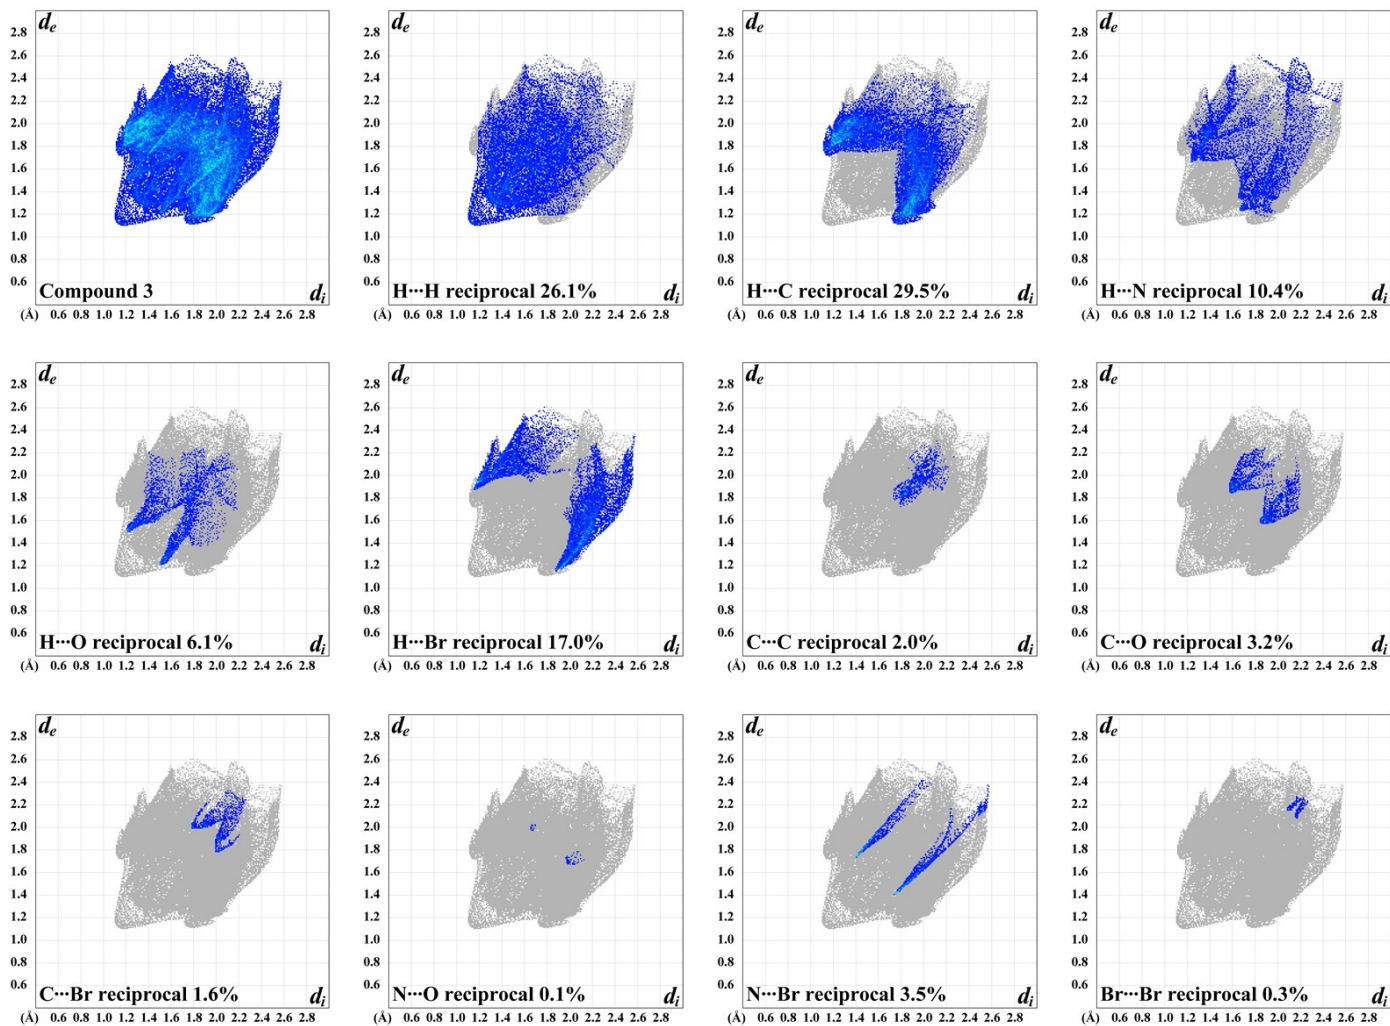

**Fig. S3** 2D fingerprint plots and decomposed 2D fingerprint plots of observed contacts for **3**.
